# Supplementary material for: Assessment of inter-rater and intra-rater reliability of the Luna EMG robot as a tool for assessing upper limb proprioception in patients with stroke—a prospective observational study
Source: PeerJ. 2024 Aug 29;12:e17903. doi: 10.7717/peerj.17903 (PMC11366229; doi:10.7717/peerj.17903)
Supplement: Supplemental Information 1 [file peerj-12-17903-s001.xlsx]

## Sheet: Arkusz1
Lp.	Sex	Age	Body mass [kg]	Body height [cm]	BMI (Body mass index)	Current place of residence	Way of living	Education	Time since stroke [months]	Hypertension	Dominant hand	The hand is being examined	Side of paresis	Exam I Researcher 1	Exam I Researcher 2	Exam II Researcher 1	Exam II Researcher 2
1	F	65	60	170	20.76	3	2	2	8	yes	R	L	L	10	11	10	9.9
										no	R	R		8.6	8.4	8.4	8.5
2	M	49	80	180	24.69	3	5	3	12	no	R	L		8.7	8.8	8.4	8.6
											R	R	R	9.2	9	8.9	9.3
3	M	52	87	187	24.88	3	5	3	36	no	R	L		7.6	7.7	7.5	7.6
											R	R	R	9.3	9.7	9.4	9.2
4	M	60	79	179	24.66	4	1	2	38	no	R	L		11	10.8	10.9	11.1
											R	R	R	12.1	12	12	11.9
5	M	66	77	177	24.58	1	2	2	10	no	R	L	L	8.3	8.2	8	8.1
											R	R		6.7	6.5	6.4	6.6
6	M	70	89	170	30.8	4	2	3	12	yes	R	L		5.6	5.5	5.4	5.4
											R	R	R	7.6	7.5	7.4	7.5
7	M	62	92	173	32.5	2	2	4	12	yes	R	L	L	8.6	8.8	8.5	8.6
											R	R		4.5	4.2	4.4	4.3
8	F	56	60	169	21.01	2	1	3	12	no	R	L	L	10.2	10.3	10.1	10.2
											R	R		6.5	6.6	6.3	6.6
9	F	48	58	166	21.05	2	2	4	7	no	R	L	L	6.7	6.5	6.6	6.5
											R	R		4.2	4.3	4.1	4.3
10	M	67	80	179	24.97	2	3	1	9	no	R	L		4.5	4.3	4.4	4.5
											R	R	R	5.3	5.2	5.3	5
11	F	45	50	166	18.14	3	1	4	9	yes	R	L	L	5.6	5.5	5.6	5.4
											R	R		3.3	3.5	3.3	3.4
12	F	47	51	160	19.92	3	1	4	14	yes	R	L	L	9.7	9.8	9.6	9.7
											R	R		4.5	4.2	4.4	4.1
13	M	69	78	170	26.99	3	3	3	16	yes	R	L	L	6.1	6.2	6.2	6.1
											R	R		4.5	4.4	4.4	4.6
14	M	75	90	184	26.58	3	2	2	18	yes	R	L		14.3	14.2	14.3	14.1
											R	R	R	16.2	16.2	16.1	16
15	M	69	79	173	26.4	3	2	3	14	yes	R	L		9.2	9.3	9.1	9.3
											R	R	R	12.2	12.1	11.8	12.3
16	M	70	81	179	24.97	1	2	1	40	yes	R	L		8.2	8.3	8.2	8.1
											R	L	L	6	6.3	6.1	5.9
17	M	65	78	169	27.31	3	2	3	36	no	R	R		5.2	5.4	5.3	5.2
											R	L	L	6.7	6.6	6.7	6.5
18	F	50	49	158	19.63	4	2	4	11	no	R	R	R	6.5	6.6	6.5	6.7
											R	L		2.3	2.4	2.3	2.2
19	F	49	50	164	18.59	4	1	3	12	yes	R	L	L	12.1	12	12.2	12
											R	R		6.3	6.2	6.1	6.2
20	F	45	55	176	17.76	4	1	3	14	yes	R	L	L	5.7	5.5	5.6	5.6
											R	R		3.2	3.3	3.1	3.3
21	F	45	52	172	17.58	4	1	3	16	yes	R	R	R	8.1	8.2	8.4	8.3
											R	R		3.5	3.4	3.5	3.3
22	M	60	87	185	25.42	4	2	2	18	yes	R	L	L	8.5	8.6	8.7	8.4
											R	R		3.2	3.2	3.1	3.3
23	M	67	80	180	24.69	1	3	1	42	no	R	L		3.4	3.3	3.5	3.5
											R	R	R	6.7	6.6	6.5	6.7
24	M	56	77	182	23.25	2	2	3	46	no	R	L		3.4	3.3	3.5	3.4
											R	R	R	7.8	7.7	7.7	7.7
25	F	46	48	159	18.99	2	1	4	40	yes	R	L		2.3	2.4	2.5	2.4
											R	R	R	4.7	4.6	4.5	4.7
26	F	45	61	170	21.11	3	4	4	22	no	R	L		5.7	5.6	5.5	5.7
											R	R	R	6.5	6.3	6.2	6.6
27	M	48	66	170	22.84	3	4	2	24	yes	R	L		1.2	1.3	1.3	1.4
											R	R	R	4	4.1	4.1	4
28	F	60	68	172	22.99	4	3	2	26	yes	R	L		1.4	1.5	1.6	1.2
											R	R	R	9.8	9.7	9.8	9.6
29	F	62	72	170	24.99	4	3	2	12	no	R	L	L	14.1	14	14.2	14
											R	R		10.2	10	10.1	10.3
30	F	65	70	168	24.8	1	2	2	10	no	R	L		2.3	2.4	2.2	2.3
											R	R	R	6.6	6.7	6.8	6.5
31	M	65	75	176	24.21	1	2	3	8	no	R	L	L	6.3	6.4	6.3	6.3
											R	R		4.5	4.4	4.4	4.5
32	F	58	70	172	23.66	2	1	3	12	no	R	L	L	8.9	8.8	8.7	8.9
											R	R		4.4	4.5	4.6	4.5
33	F	59	65	168	23.03	2	2	3	16	no	R	L	L	12.4	12.3	12.2	12.1
											R	R		5.9	5.8	5.9	5.7
34	F	53	68	172	22.99	2	2	3	16	yes	R	L		2.3	2.4	2.2	2.1
											R	R	R	5.7	5.2	5.3	5.6
35	F	70	75	173	25.06	2	3	2	18	yes	R	L	L	6.8	6.5	6.7	6.4
											R	R		2.4	2.3	2.5	2.2
36	F	69	68	168	24.09	2	3	3	24	yes	R	L		2.4	2.5	2.6	2.3
											R	R	R	7.8	7.7	7.6	7.5
37	M	70	78	186	22.55	3	2	3	48	yes	R	L	L	8.3	8.2	8	8.4
											R	R		2.1	2.2	2	2.1
38	F	49	56	178	17.67	3	1	4	18	yes	R	L	L	14.1	14	13.9	14
											R	R		10	9.9	9.8	9.8
39	F	50	55	170	19.03	3	1	3	16	yes	R	L	L	6.5	6.6	6.6	6.3
											R	R		2.1	2.2	2.1	2
40	F	52	62	170	21.45	3	1	3	12	no	R	L		2.4	2.3	2.5	2.2
											R	R	R	7.3	7.2	7	7.2
41	F	60	67	179	29.91	3	2	2	9	no	R	L	L	4.5	4.4	4.1	4.5
											R	R		2.3	2.2	2.5	2.6
42	F	60	57	160	22.27	4	2	2	12	no	R	L	L	13.2	13.2	13.1	13.3
											R	R		8.7	8.8	8.6	8.5
43	F	45	49	158	19.63	4	1	4	18	no	R	L		3.8	3.9	3.7	3.8
											R	R	R	4.7	4.8	4.9	4.6
44	M	58	82	176	26.47	1	4	3	24	no	R	L	L	8.4	8.5	8.3	8
											R	R		2.5	2.6	2.4	2.5
45	M	54	88	180	27.16	2	4	3	28	no	R	L	L	8.2	8.2	8.1	8.3
											R	R		6.9	6.6	6.7	6.9
46	M	55	78	179	24.34	2	4	3	18	yes	R	L	L	6.2	6.3	6.2	6
											R	R		2.3	2.4	2.2	2.1
47	M	59	101	182	32.7	1	2	3	36	no	R	L	L	7.9	7.8	7.6	7.7
											R	R		3.2	3.2	3	3.2
48	M	56	88	180	27.16	2	3	2	38	no	R	L	L	4.5	4.4	4.6	4.5
											R	R		2.1	2	2.3	2
49	F	58	66	168	23.38	2	2	2	24	yes	R	L		7.6	7.5	7.3	7.5
											R	R	R	9.9	10	9.8	9.9
50	F	48	51	165	18.73	4	1	2	12	yes	R	L	L	5.6	5.3	5.4	5.2
											R	R		2	1.9	2.3	2.2
51	M	65	70	175	22.86	2	2	2	14	yes	R	L	L	8.4	8.3	8.2	8.4
											R	R		5.7	5.5	5.7	5.6
52	F	56	51	160	19.92	2	2	3	7	yes	R	L	L	4.1	4.3	4.2	4.4
											R	R		2.3	2.2	2.5	2.4
53	F	66	49	159	19.38	2	3	1	9	yes	R	L	L	8.7	8.6	8.5	8.6
											R	R		5.6	5.5	5.7	5.6
54	F	55	54	165	19.83	3	1	2	16	yes	R	L		3.4	3.5	3.3	3.4
											R	R	R	6.5	6.3	6.4	6.6
55	F	58	68	170	23.53	3	1	2	18	yes	R	L	L	5.7	5.6	5.5	5.6
											R	R		3.3	3.4	3.5	3.5
56	M	60	87	179	27.15	4	2	3	36	yes	R	L	L	4.9	5	5.1	4.9
											R	R		2.1	2	2.3	2
57	F	58	48	160	18.75	4	2	4	38	yes	R	L	L	12.7	12.6	12.5	12.6
											R	R		9.1	9	9	9.2
58	F	62	65	160	23.44	1	2	3	48	yes	R	L		2	2.1	2	2.2
											R	R	R	3.9	3.7	3.8	3.8
59	F	64	68	170	23.53	1	2	4	48	yes	R	L	L	10.1	10.2	10	10.2
											R	R		6.4	6.5	6.4	6.3
60	F	73	75	172	25.35	2	3	3	52	yes	R	L	L	7.1	7.2	7	7.1
											R	R		3.5	3.3	3.4	3.6
61	F	70	77	170	26.64	1	3	1	18	yes	R	L		5.3	5.4	5.3	5.5
											R	R	R	7.9	8	7.8	8.1
62	F	68	58	169	20.31	2	3	2	24	yes	R	L		9.3	9.4	9.2	9.3
											R	R	R	12.2	12	12.3	12
63	F	67	59	163	22.21	2	2	2	28	yes	R	L		3.5	3.4	3.4	3.4
											R	R	R	6.7	6.6	6.8	6.6
64	F	59	68	170	23.53	2	1	4	20	yes	R	L		1.9	2.1	2	2.2
											R	R	R	7.3	7.4	7.5	7.2
65	F	58	70	168	24.8	3	1	4	18	no	R	L	L	4.6	4.7	4.5	4.6
											R	R		3.6	3.4	3.5	3.5
66	F	54	78	170	26.99	2	1	3	12	no	R	L	L	6.2	6.3	6.4	6.1
											R	R		4	4.1	4.2	4
67	M	75	80	175	26.12	2	3	2	12	no	R	L		2.4	2.5	2.6	2.4
											R	R	R	5.4	5.5	5.6	5.5
68	F	50	49	160	19.14	2	4	2	7	no	R	L		2.1	2.2	2.2	2
											R	R	R	3.7	3.6	3.5	3.4
69	F	53	50	160	19.53	4	4	3	9	no	R	L	L	7.6	7.7	7.4	7.5
											R	R		2.7	2.8	2.9	2.7
70	M	56	70	170	24.22	3	4	3	14	no	R	L	L	13.2	13.2	13.3	13.4
											R	R		8.7	8.6	8.7	8.5
71	M	65	99	176	31.2	2	2	3	16	yes	R	L	L	5.3	5.4	5.2	5.3
											R	R		2.9	2.8	2.7	2.8
72	F	50	50	165	18.37	2	3	2	18	yes	R	L	L	6.5	6.3	6.4	6.3
											R	R		3.2	3.3	3.2	3
73	F	54	55	169	19.26	2	1	2	24	no	R	L	L	11.9	12.1	11.8	12.2
											R	R		4.8	4.9	4.7	4.8
74	F	60	55	160	21.48	2	2	2	28	yes	R	L	L	11.1	11.3	11.1	11
											R	R		2.1	2.2	2.3	2.1
75	F	67	69	168	24.45	2	2	3	9	yes	R	L		4.3	4.4	4.5	4.3
											R	R	L	12.2	12	12.1	11.9
76	F	63	76	172	25.69	3	2	3	36	yes	R	L		2	1.9	2.1	1.9
											R	R	R	4.5	4.6	4.5	4.7
77	F	59	68	168	24.09	3	2	2	38	yes	R	L		5.2	5.1	5	5.2
											R	R	R	7.1	7	7.2	7
78	F	70	70	160	27.34	4	3	1	24	yes	R	L		2	2.4	2.3	2.2
											R	R	R	4.9	4.7	4.8	4.7
79	M	56	76	179	23.72	2	2	3	26	yes	R	L	L	5.4	5.2	5.3	5.3
											R	R		1.9	2	1.8	2.1
80	M	63	77	180	23.77	1	2	4	28	no	R	L		3	3.1	3.2	3
											R	R	R	6.7	6.8	6.5	6.6
81	F	63	57	168	20.2	1	2	3	24	no	R	L		6.6	6.5	6.3	6.6
											R	R	R	13.5	12.2	12.3	13.2
82	F	65	55	170	19.03	1	2	2	12	no	R	L		2.2	2.5	2.3	2.4
											R	R	R	3.7	3.6	3.8	3.7
83	F	67	58	170	20.07	2	2	3	12	no	R	L	L	10.5	10	10.2	10.3
											R	R	R	7.6	7.7	7.6	7.7
84	F	58	68	168	24.09	2	1	3	9	no	R	L		3.1	3.2	3.3	3.2
											R	R	R	7.5	7.3	7.4	7.3
85	F	55	65	172	21.97	2	1	2	10	no	R	L	L	4	3.2	3.9	3.8
											R	R		1.9	1.8	2	2.1
86	F	57	70	164	26.03	2	2	2	11	no	R	L		1.5	1.9	1.5	1.6
											R	R	R	6	5.9	5.8	5.7
87	F	56	75	162	28.58	2	2	2	13	no	R	L		2.1	2	1.9	2.3
											R	R	R	8.7	8.6	8.5	8.8
88	F	55	50	165	18.37	4	2	4	14	yes	R	L	L	12.6	12.3	12.4	12.2
											R	R		2.9	3.1	3	3
89	F	59	52	170	17.99	3	2	4	16	yes	R	L		1.9	2	1.8	1.9
											R	R	R	4.3	4.4	4.5	4.2
90	M	64	55	168	19.49	2	2	4	18	yes	R	L	L	4.3	4.4	4.2	4.3
											R	R		1.7	1.8	1.9	1.8
91	M	49	70	175	22.86	1	4	1	9	yes	R	L	L	5.4	5.5	5.2	5.3
											R	R		2	1.8	2.1	1.9
92	F	57	69	178	21.78	1	5	2	38	yes	R	L	L	7.6	7.7	7.5	7.4
											R	R		3.2	3.3	3.2	3.4
93	F	58	66	168	23.38	3	4	2	42	yes	R	L		6.6	6.5	6.6	6.7
											R	R	R	8	8.1	8	8.2
94	F	49	56	162	21.34	3	5	3	48	yes	R	L		10	9.8	9.9	9.8
											R	R	R	14	13.9	13.8	14.1
95	M	58	50	159	19.78	4	4	3	48	yes	R	L	L	7.5	7.6	7.7	7.4
											R	R		2.3	2.2	2.1	2
96	M	64	60	167	21.51	4	3	3	24	yes	R	L		9.6	9.5	9.4	9.5
											R	R	R	14.6	14.5	14.5	14.5
97	M	66	68	159	26.9	2	2	3	36	yes	R	L	L	5.3	5.4	5.5	5.2
											R	R		2,2	2.3	2.4	2.1
98	M	66	70	178	22.09	2	2	3	36	yes	R	L		2	2.1	2.2	2
											R	R	R	4.5	4.4	4.6	4.4
99	F	62	70	169	24.51	2	2	2	12	yes	R	L	L	7.6	7.7	7.4	7.7
											R	R		1.9	1.9	2	2.2
100	F	62	68	166	24.68	2	2	3	14	yes	R	L		6.5	6.4	6.3	6.4
											R	R	R	8.6	8.4	8.5	8.5
101	F	58	54	170	18.69	2	1	2	16	yes	R	L	L	4.6	4.7	4.8	4.5
											R	R		3.5	3.4	3.4	3.5
102	M	58	55	164	20.45	2	1	2	18	yes	R	L	L	6.2	6	6.1	6.2
											R	R		3.1	3	2.9	3.2
103	M	67	89	171	32.8	3	2	3	18	no	R	L	L	9.2	9	9.2	9.3
											R	R		2.4	2.3	2.4	2.3
104	M	49	68	166	24.68	2	4	4	18	no	R	L	L	5.8	5.6	5.6	5.7
											R	R		3.1	3	3.1	3.2
105	M	70	72	168	25.51	3	2	1	24	no	R	L		8	7.9	8.1	8
											R	R	R	12.9	12.9	13.1	12.7
106	M	72	70	170	24.22	3	2	1	26	no	R	L		4.6	4.4	4.5	4.3
											R	R	R	10.9	11	10.8	10.7
107	F	68	79	170	27.34	3	3	2	28	no	R	L	L	5.6	5.7	5.1	5
											R	R		1.9	2	1.5	1.4
108	F	68	85	177	27.13	4	3	2	9	no	R	L	L	14.5	14.3	12.1	12.2
											R	R		10.2	10.3	8.9	8.8
109	M	67	68	167	24.38	2	4	3	11	no	R	L		5.3	5.2	4.3	4.1
											R	R	R	8.4	8.6	7.9	7.7
110	M	59	70	176	22.6	2	3	3	12	no	R	L	L	8.1	8.3	7.8	7.7
											R	R		5.5	5.6	5	5.1
111	F	59	56	170	19.8	2	2	4	14	yes	R	L		2.9	3	2.6	2.5
											R	R	R	4.3	4.2	3.8	3.9
112	F	58	51	160	19.92	4	2	4	16	no	R	L		10.5	10.4	10	9.9
											R	R		5.6	5.7	5	5.1
113	M	59	68	160	26.56	2	2	4	18	no	R	L	L	4.9	5	4.7	4.5
											R	R		3.2	3.3	2.9	3
114	F	53	66	162	25.15	4	2	4	24	no	R	L	L	11.5	11.6	11.2	11.1
											R	R		7.4	7.3	7	6.9
115	F	68	77	164	28.63	3	3	4	28	no	R	L		2.1	2.2	2	1.9
											R	R	R	6	6.3	6	6.1
116	M	66	89	170	30.8	3	3	3	36	no	R	L	L	7.7	7.7	7.6	7.3
											R	R		2.4	2.5	2.3	2.2
117	F	60	70	167	25.12	3	2	4	11	no	R	L	L	14.7	14.6	14.3	14.4
											R	R		5.2	5.1	5	5
118	F	68	75	166	27.22	2	2	4	10	no	R	L	L	14.6	16.4	14.3	14.2
											R	R		4.2	4.1	4	4.1
119	M	70	90	180	27.78	2	2	1	9	yes	R	L		2.8	2.7	2.6	2.7
											R	R	R	12.7	12.6	12.4	12.3
120	M	68	84	170	29.07	2	4	1	12	yes	R	L	L	14.3	14.2	14	14.1
											R	R		8.9	8.8	8.6	8.7
121	F	69	60	164	22.31	3	4	1	14	yes	R	L	L	7.6	7.7	7.5	7.5
											R	R		2.5	2.6	2.4	2.3
122	F	66	70	168	24.8	3	4	2	16	yes	R	L	L	9.7	9.8	9.6	9.4
											R	R		5.6	5.6	5.3	5.4
123	M	69	89	173	29.4	3	3	3	24	yes	R	L		2.1	2	2.3	2.2
											R	R	R	6.7	6.6	6.6	6.5
124	F	55	65	170	22.49	3	2	4	28	yes	R	L	L	6.5	6.3	6.4	6.1
											R	R	R	4	3.9	3.8	3.9
125	F	55	78	172	26.37	1	5	4	36	yes	R	L	L	4.5	4.4	4.3	4.3
											R	R		3.2	3.4	3	3.1
126	F	58	70	165	25.71	1	5	2	36	yes	R	L		3	3.2	3	3
											R	R	R	3.6	3.8	3.6	3.5
	M - Man; F- Woman					1. Urban area > 100,000 population					R - right	R - right; L - left	R - right; L- left
						2. Urban area 50-100,000 population
						3. Urban area <50, 000 population
						4. Rural area
								1. Primary
								2. Vocational
								3. Secondary
								4. Higher
							1. wife and children
							2. with husband/ wife
							3. with children
							4. with another person
							5. alone
